# Supplementary material for: Investigating the Marginal and Herd Effects of COVID-19 Vaccination for Reducing Case Fatality Rate: Evidence from the United States between March 2021 to January 2022
Source: MDPI journal article supplement (doi:10.3390/vaccines11061078), 2023-06-09
Supplement: s1 [file s1]

## 1-R code:

```
## Read the vaccination dataset
vacc <- read.csv('COVID-19_Vaccinations_in_the_United_States_County.csv')
## See how the dataset looks like for a single county
v1 <- vacc[vacc$FIPS==21151,]
## Read the raw time-series case counts
case <- read.csv('Raw Data/time_series_covid19_confirmed_US.csv')
## Read the raw time-series death counts
death <- read.csv('Raw Data/time_series_covid19_deaths_US.csv')
## Creat case fatality ratio
cfr <- death[,-(1:12)]/case[,-(1:11)]
cfr <- cbind.data.frame(death[,1:12],cfr)
write.csv(cfr,'cfr.csv',row.names = FALSE)

## Code for cleaning the data should be put here.
## The cleaned data is project.csv
## The data project.csv needs to be further cleaned, to address the following issues:
## Get rid of unknown counties.
## Remove rows with missing values in ppct, sppct and cfr.

## Find the breakpoints
library(segmented)
library(tidyverse)
project <- read.csv('project.csv')
project <- project[,-6]
## project <- project[!is.na(project$FIPS),]
colnames(project) <-
c("date","fips","county","state","ppct","theme1","theme2","theme3","theme4","cfr")
## But we need to select the right period,i.e., between March 11, 2021 and Jan 26, 2022
## The kickoff date of vaccination campaign in the US is March 11, 2021
## The date President Biden announce all Americans are eligible for vaccination
## The end date is Jan 26, 2022 when CDC announce that more than 99.9% of the virus
are Omicron
project <-
project%>%mutate(date=as.Date(date),cfr=100*cfr)%>%filter(date>=as.Date("2021-3-
11")&date<=as.Date("2022-1-26"))
mod <- lm(cfr~ppct+theme1+theme2+theme3+theme4,data = project)
project1 <-
project%>%group_by(date)%>%summarise(mcfr=mean(cfr),mppct=mean(ppct))
plot(project1$mppct,project1$mcfr,type='l')

## First analysis
## Segmented regression based on the mean data project1
```

```

## National level
mod <- lm(mcfr~mppct,data=project1)
selgmented(mod,seg.Z = ~mppct,type = "bic",Kmax = 3)
smod <- segmented(mod,seg.Z = ~mppct,npsi = 3)

## We identified 3 breakpoints,i.e.,32,36 and 47
plot(project1$mppct,project1$mcfr,type='l')
abline(v=32,lty=2,col='red')
abline(v=36,lty=2,col='red')
abline(v=47,lty=2,col='red')

## Create figure 1
k=data.frame(mppct=c(32,36,47),mcfr=c(1.97,1.758,1.767))
project1%>%ggplot(aes(x=mppct/100,y=mcfr/100))+geom_line()+geom_point(data=k)
+scale_y_continuous(
  name = "Mean CFR", labels = scales::label_percent())+scale_x_continuous(
  name = "Mean Vaccination Coverage", labels =
scales::label_percent())+geom_point(data = k)

## We created the segmented regression model ourselves
project1 %>%mutate(d1=ifelse(mppct>=32&mppct<36,1,0),d2=ifelse(mppct>=36&mp
pct<47,1,0),d3=ifelse(mppct>=47,1,0))
project1 %>%mutate(mppct1=d1*(mppct-32),mppct2=d2*(mppct-
36),mppct3=d3*(mppct-47))
mod1 <- lm(mcfr~mppct+d1+d2+d3+mppct1+mppct2+mppct3,data = project1)
summary(mod1)

## Calculate the p-values associated with the herd and marginal effects
m=vcov(mod1)
coe=coef(mod1)
## herd2
v=c(0,0,-1,1,0,0,0,0)
2*pt(sum(coe*v)/sqrt(t(v)%*%m%*%v),314)
## herd3
v=c(0,0,0,-1,1,0,0,0)
2*(1-pt(sum(coe*v)/sqrt(t(v)%*%m%*%v),314))
## margin2
v=c(0,1,0,0,0,1,0,0)
2*pt(sum(coe*v)/sqrt(t(v)%*%m%*%v),314)
## margin3
v=c(0,1,0,0,0,0,1,0)
2*(1-pt(sum(coe*v)/sqrt(t(v)%*%m%*%v),314))
## margin4

```

```

v=c(0,1,0,0,0,0,0,1)
2*pt(sum(coe*v)/sqrt(t(v)%*%m%*%v),314)

## Run mixed models
## First create dummy variables based on the three breakpoints
project <-
project%>%mutate(d1=ifelse(ppct>=32&ppct<36,1,0),d2=ifelse(ppct>=36&ppct<47,1,
0),d3=ifelse(ppct>=47,1,0))
project <- project%>%mutate(ppct1=d1*(ppct-32),ppct2=d2*(ppct-
36),ppct3=d3*(ppct-47))
## See an example
dat <- project%>%filter(fips==6113)
mod <- lm(cfr~ppct+d1+d2+d3+ppct1+ppct2+ppct3,data = dat)
summary(mod)
plot(dat$ppct,dat$cfr,type='l')

## Use lmer function
library(lme4)
library(RLRSim)
mixmod0 <-
lmer(cfr~1+ppct+d1+d2+d3+ppct1+ppct2+ppct3+(1|fips)+theme1+theme2+theme3
+theme4,data =
project,REML=FALSE,control=lmerControl(optimizer="bobyqa",calc.derivs
FALSE,optCtrl=list(maxfun=2e5)))
mixmod1 <-
lmer(cfr~1+ppct+d1+d2+d3+ppct1+ppct2+ppct3+(1+ppct+ppct1+ppct2+ppct3|fips)
+theme1+theme2+theme3+theme4,data =
project,REML=FALSE,control=lmerControl(optimizer="bobyqa",calc.derivs
FALSE,optCtrl=list(maxfun=2e5)))
mixmod2 <-
lmer(cfr~1+ppct+d1+d2+d3+ppct1+ppct2+ppct3+(1+ppct+d1+d2+d3+ppct1+ppct2
+ppct3|fips)+theme1+theme2+theme3+theme4,data =
project,REML=FALSE,control=lmerControl(optimizer="bobyqa",calc.derivs
FALSE,optCtrl=list(maxfun=2e5)))

## Running the code above (about mixed models) was quite slow in R.
## So we used STATA to run the same models, see details in the appendix.

## Calculate the p-values associated with the herd and marginal effects
## herd2
tst=(-0.0175721+0.0251904)/(0.00001174+0.0003834-2*6.209e-07)^0.5
2*(1-pt(tst,310))
## herd3
tst=(-0.0039231+0.0175721)/(0.0001276+0.0003834-2*2.033e-06)^0.5

```

```
2*(1-pt(tst,310))  
## margin2  
tst=(-0.0036004-0.0067726)/(1.654e-07+3.284e-06-2*4.495e-09)^0.5  
2*pt(tst,310)  
## margin3  
tst=(-0.0036004-0.0196573)/(1.654e-07+2.261e-06-2*4.983e-09)^0.5  
2*pt(tst,310)  
## margin4  
tst=(-0.0036004-0.0393751)/(1.654e-07+2.809e-06-2*5.985e-09)^0.5  
2*pt(tst,310)
```

2-Analysis at county level (mixed model) using STATA (the maximum likelihood estimation method was used for implementing all the models below):

### 1. model1: random effects for all terms except theme1 through theme4

```
. mixed c.cfr c.vc i.d1 i.d2 i.d3 c.vc1 c.vc2 c.vc3 theme1 theme2 theme3 theme4 || fips: c.vc i.d1 i.d2 i.d3 c
> .vc1 c.vc2 c.vc3, mle
```

#### Output:

```
Mixed-effects ML regression
Group variable: fips
Number of obs      = 1,001,098
Number of groups   = 3,109
Obs per group:
    min = 322
    avg = 322.0
    max = 322
Wald chi2(11)      = 1016.31
Prob > chi2        = 0.0000
Log likelihood = 513590.06
```

| cfr    | Coefficient | Std. err. | z      | P> z  | [95% conf. interval] |           |
|--------|-------------|-----------|--------|-------|----------------------|-----------|
| vc     | -.0036004   | .0004067  | -8.85  | 0.000 | -.0043975            | -.0028034 |
| 1.d1   | -.0251904   | .0034266  | -7.35  | 0.000 | -.0319065            | -.0184743 |
| 1.d2   | -.0175721   | .0061915  | -2.84  | 0.005 | -.0297073            | -.0054369 |
| 1.d3   | -.0039231   | .0112962  | -0.35  | 0.728 | -.0260633            | .0182171  |
| vc1    | -.0067726   | .0018122  | -3.74  | 0.000 | -.0103244            | -.0032208 |
| vc2    | -.0196573   | .0015037  | -13.07 | 0.000 | -.0226045            | -.01671   |
| vc3    | -.0393751   | .0016761  | -23.49 | 0.000 | -.0426603            | -.0360899 |
| theme1 | .0003766    | .0011555  | 0.33   | 0.744 | -.0018882            | .0026414  |
| theme2 | .8068916    | .0733619  | 11.00  | 0.000 | .6631049             | .9506783  |
| theme3 | -.0573455   | .0788306  | -0.73  | 0.467 | -.2118507            | .0971597  |
| theme4 | .0038997    | .0806247  | 0.05   | 0.961 | -.1541218            | .1619213  |
| _cons  | 1.640176    | .0567852  | 28.88  | 0.000 | 1.528879             | 1.751473  |

| Random-effects parameters | Estimate | Std. err. | [95% conf. interval] |          |
|---------------------------|----------|-----------|----------------------|----------|
| <b>fips: Independent</b>  |          |           |                      |          |
| var(vc)                   | .0004989 | .0000129  | .0004743             | .0005248 |
| var(1.d1)                 | .0238676 | .0007884  | .0223713             | .0254639 |
| var(1.d2)                 | .0912826 | .0028374  | .0858875             | .0970167 |
| var(1.d3)                 | .1991367 | .0074995  | .1849673             | .2143915 |
| var(vc1)                  | .0072339 | .000239   | .0067802             | .0077178 |
| var(vc2)                  | .0056307 | .0001856  | .0052784             | .0060064 |
| var(vc3)                  | .0042457 | .0001783  | .0039102             | .0046099 |
| var(_cons)                | 1.32611  | .0338076  | 1.261477             | 1.394055 |
| var(Residual)             | .0189058 | .000027   | .0188529             | .0189588 |

LR test vs. linear model: chi2(8) = 3.6e+06 Prob > chi2 = 0.0000

Note: LR test is conservative and provided only for reference.

The covariance of random effects

`. estat recovariance`

Random-effects covariance matrix for level `fips`

|       | d1       | d2       | d3       | ppct     | ppct1    | ppct2    |
|-------|----------|----------|----------|----------|----------|----------|
| d1    | .0238676 |          |          |          |          |          |
| d2    | 0        | .0912826 |          |          |          |          |
| d3    | 0        | 0        | .1991367 |          |          |          |
| ppct  | 0        | 0        | 0        | .0004989 |          |          |
| ppct1 | 0        | 0        | 0        | 0        | .0072339 |          |
| ppct2 | 0        | 0        | 0        | 0        | 0        | .0056307 |
| ppct3 | 0        | 0        | 0        | 0        | 0        | 0        |
| _cons | 0        | 0        | 0        | 0        | 0        | 0        |

  

|       | ppct3    | _cons   |
|-------|----------|---------|
| ppct3 | .0042457 |         |
| _cons | 0        | 1.32611 |

The covariance matrix of the fixed effects in model 1:

`. estat vce`

Covariance matrix of coefficients of `mixed` model

|      | cfr        |            |            |            |           |           |           |
|------|------------|------------|------------|------------|-----------|-----------|-----------|
| e(V) | vc         | 1.<br>d1   | 1.<br>d2   | 1.<br>d3   | vc1       | vc2       | vc3       |
| cfr  |            |            |            |            |           |           |           |
| vc   | 1.654e-07  |            |            |            |           |           |           |
| 1.d1 | -2.852e-08 | .00001174  |            |            |           |           |           |
| 1.d2 | -7.419e-08 | 6.209e-07  | .00003834  |            |           |           |           |
| 1.d3 | -1.566e-07 | 1.011e-06  | 2.033e-06  | .0001276   |           |           |           |
| vc1  | -4.495e-09 | -7.162e-07 | 9.894e-08  | 1.485e-07  | 3.284e-06 |           |           |
| vc2  | -4.983e-09 | 2.775e-08  | -2.885e-07 | 1.843e-07  | 4.746e-09 | 2.261e-06 |           |
| vc3  | -5.985e-09 | 3.483e-08  | 6.949e-08  | -1.201e-07 | 5.876e-09 | 6.619e-09 | 2.809e-06 |

Save this model as `m1` in STATA.

`. est sto m1`

2. We noticed that the random effect sizes of vc, vc1, vc2, vc3 were small, and therefore we considered removing the random effects of those four terms in the model2.

```
. mixed c.cfr c.vc i.d1 i.d2 i.d3 c.vc1 c.vc2 c.vc3 theme1 theme2 theme3 theme4
> || fips: i.d1 i.d2 i.d3, mle
```

### Output:

```
Iteration 0: log likelihood = 209406.2
Iteration 1: log likelihood = 209406.2
```

Computing standard errors ...

```
Mixed-effects ML regression
Group variable: fips
Number of obs      = 1,001,098
Number of groups   = 3,109
Obs per group:
    min = 322
    avg = 322.0
    max = 322
Wald chi2(11)      = 84270.90
Prob > chi2        = 0.0000
Log likelihood = 209406.2
```

| cfr    | Coefficient | Std. err. | z       | P> z  | [95% conf. interval] |           |
|--------|-------------|-----------|---------|-------|----------------------|-----------|
| vc     | -.0058018   | .0000486  | -119.40 | 0.000 | -.005897             | -.0057065 |
| 1.d1   | .0042839    | .0056506  | 0.76    | 0.448 | -.0067912            | .015359   |
| 1.d2   | .0395135    | .0067861  | 5.82    | 0.000 | .0262129             | .052814   |
| 1.d3   | .0471648    | .0103839  | 4.54    | 0.000 | .0268126             | .0675169  |
| vc1    | -.0037126   | .0005969  | -6.22   | 0.000 | -.0048825            | -.0025427 |
| vc2    | -.0112739   | .0001549  | -72.77  | 0.000 | -.0115776            | -.0109703 |
| vc3    | -.0150956   | .0001016  | -148.56 | 0.000 | -.0152948            | -.0148965 |
| theme1 | .0002682    | .0009363  | 0.29    | 0.775 | -.001567             | .0021034  |
| theme2 | .882877     | .059442   | 14.85   | 0.000 | .7663728             | .9993812  |
| theme3 | -.0280334   | .0639139  | -0.44   | 0.661 | -.1533022            | .0972355  |
| theme4 | -.0121168   | .0653133  | -0.19   | 0.853 | -.1401285            | .1158948  |
| _cons  | 1.643514    | .0460278  | 35.71   | 0.000 | 1.553301             | 1.733727  |

| Random-effects parameters | Estimate | Std. err. | [95% conf. interval] |          |
|---------------------------|----------|-----------|----------------------|----------|
| <b>fips: Independent</b>  |          |           |                      |          |
| var(1.d1)                 | .0751658 | .0021548  | .0710589             | .0795101 |
| var(1.d2)                 | .1188571 | .0032836  | .1125925             | .1254703 |
| var(1.d3)                 | .1795017 | .0062097  | .1677343             | .1920947 |
| var(_cons)                | .8738916 | .0221827  | .8314781             | .9184686 |
| var(Residual)             | .0362979 | .0000516  | .036197              | .0363992 |

LR test vs. linear model: chi2(4) = 3.0e+06 Prob > chi2 = 0.0000

Note: LR test is conservative and provided only for reference.

Save this model as m2 in STATA.

```
. est sto m2
```

### 3. Using Likelihood Ratio Test to compare m1 and m2.

```
. lrtest m1 m2, stats
```

Likelihood-ratio test

Assumption: m2 nested within m1

LR chi2(4) = **608367.73**

Prob > chi2 = **0.0000**

Note: The reported degrees of freedom assumes the null hypothesis is not on the boundary of the parameter space. If this is not true, then the reported test is [conservative](#).

Akaike's information criterion and Bayesian information criterion

| Model | N         | ll(null) | ll(model) | df | AIC       | BIC       |
|-------|-----------|----------|-----------|----|-----------|-----------|
| m2    | 1,001,098 | .        | 209406.2  | 17 | -418778.4 | -418577.5 |
| m1    | 1,001,098 | .        | 513590.1  | 21 | -1027138  | -1026890  |

Note: BIC uses N = number of observations. See [\[R\] BIC note](#).

We rejected the null hypothesis and concluded that m1 was better than m2.



4. Furthermore, we observed that the random effect size of vc was the smallest. Therefore, we only removed the random effect of vc in the model3 and save this model as m3 in STATA.

Performing EM optimization ...

Performing gradient-based optimization:

Iteration 0: log likelihood = 322562.17

Iteration 1: log likelihood = 322562.17

Computing standard errors ...

|                             |                  |   |           |
|-----------------------------|------------------|---|-----------|
| Mixed-effects ML regression | Number of obs    | = | 1,001,098 |
| Group variable: fips        | Number of groups | = | 3,109     |
|                             | Obs per group:   |   |           |
|                             | min              | = | 322       |
|                             | avg              | = | 322.0     |
|                             | max              | = | 322       |
|                             | Wald chi2(11)    | = | 19757.01  |
| Log likelihood = 322562.17  | Prob > chi2      | = | 0.0000    |

| cfr    | Coefficient | Std. err. | z       | P> z  | [95% conf. interval] |           |
|--------|-------------|-----------|---------|-------|----------------------|-----------|
| vc     | -.0057919   | .0000429  | -135.01 | 0.000 | -.005876             | -.0057078 |
| 1.d1   | .0003946    | .0047291  | 0.08    | 0.934 | -.0088743            | .0096634  |
| 1.d2   | .0289429    | .0066543  | 4.35    | 0.000 | .0159007             | .0419852  |
| 1.d3   | .0863778    | .0097953  | 8.82    | 0.000 | .0671793             | .1055763  |
| vc1    | -.0045298   | .0018739  | -2.42   | 0.016 | -.0082025            | -.0008571 |
| vc2    | -.0151826   | .0013547  | -11.21  | 0.000 | -.0178378            | -.0125274 |
| vc3    | -.0336915   | .0015201  | -22.16  | 0.000 | -.0366709            | -.030712  |
| theme1 | .0002685    | .0009378  | 0.29    | 0.775 | -.0015696            | .0021066  |
| theme2 | .8856445    | .0595413  | 14.87   | 0.000 | .7689456             | 1.002343  |
| theme3 | -.0279839   | .0640191  | -0.44   | 0.662 | -.153459             | .0974912  |
| theme4 | -.0143341   | .0654228  | -0.22   | 0.827 | -.1425604            | .1138923  |
| _cons  | 1.642384    | .0461006  | 35.63   | 0.000 | 1.552028             | 1.73274   |

| Random-effects parameters | Estimate | Std. err. | [95% conf. interval] |          |
|---------------------------|----------|-----------|----------------------|----------|
| <b>fips: Independent</b>  |          |           |                      |          |
| var(1.d1)                 | .0490266 | .0014968  | .0461791             | .0520498 |
| var(1.d2)                 | .1100243 | .0032219  | .1038872             | .116524  |
| var(1.d3)                 | .1573158 | .0056196  | .1466784             | .1687247 |
| var(vc1)                  | .0073673 | .000241   | .0069097             | .0078551 |
| var(vc2)                  | .0044818 | .0001504  | .0041965             | .0047865 |
| var(vc3)                  | .0034149 | .0001469  | .0031388             | .0037152 |
| var(_cons)                | .8768629 | .0222595  | .8343026             | .9215942 |
| var(Residual)             | .0282662 | .0000403  | .0281873             | .0283453 |

LR test vs. linear model: chi2(7) = 3.2e+06 Prob > chi2 = 0.0000

Note: LR test is conservative and provided only for reference.

. est sto m3

5. Use Likelihood Ratio Test to compare m1 and m3.

```
. lrtest m1 m3, stats

Likelihood-ratio test
Assumption: m3 nested within m1

LR chi2(1) = 382055.78
Prob > chi2 = 0.0000

Note: The reported degrees of freedom assumes the null hypothesis is not on the boundary of the parameter
      space. If this is not true, then the reported test is conservative.

Akaike's information criterion and Bayesian information criterion
```

| Model | N         | ll(null) | ll(model) | df | AIC       | BIC      |
|-------|-----------|----------|-----------|----|-----------|----------|
| m3    | 1,001,098 | .        | 322562.2  | 20 | -645084.3 | -644848  |
| m1    | 1,001,098 | .        | 513590.1  | 21 | -1027138  | -1026890 |

Note: BIC uses N = number of observations. See [R] BIC note.

We rejected the null hypothesis and concluded that m1 was still better than m3.
